# Supplementary material for: Disruption of the Chitin Biosynthetic Pathway Results in Significant Changes in the Cell Growth Phenotypes and Biosynthesis of Secondary Metabolites of Monascus purpureus
Source: MDPI journal article supplement (doi:10.3390/jof8090910), 2022-08-27

**Figure S2.** Comparison of the sensitivities of the wild type *M. purpureus* LQ-6 and the mutant strain *M. purpureus*  $\Delta 5162$  cultured on PDA medium in respond to lactic acid (A), ethanol (B), H<sub>2</sub>O<sub>2</sub> (C) and NaCl (D).

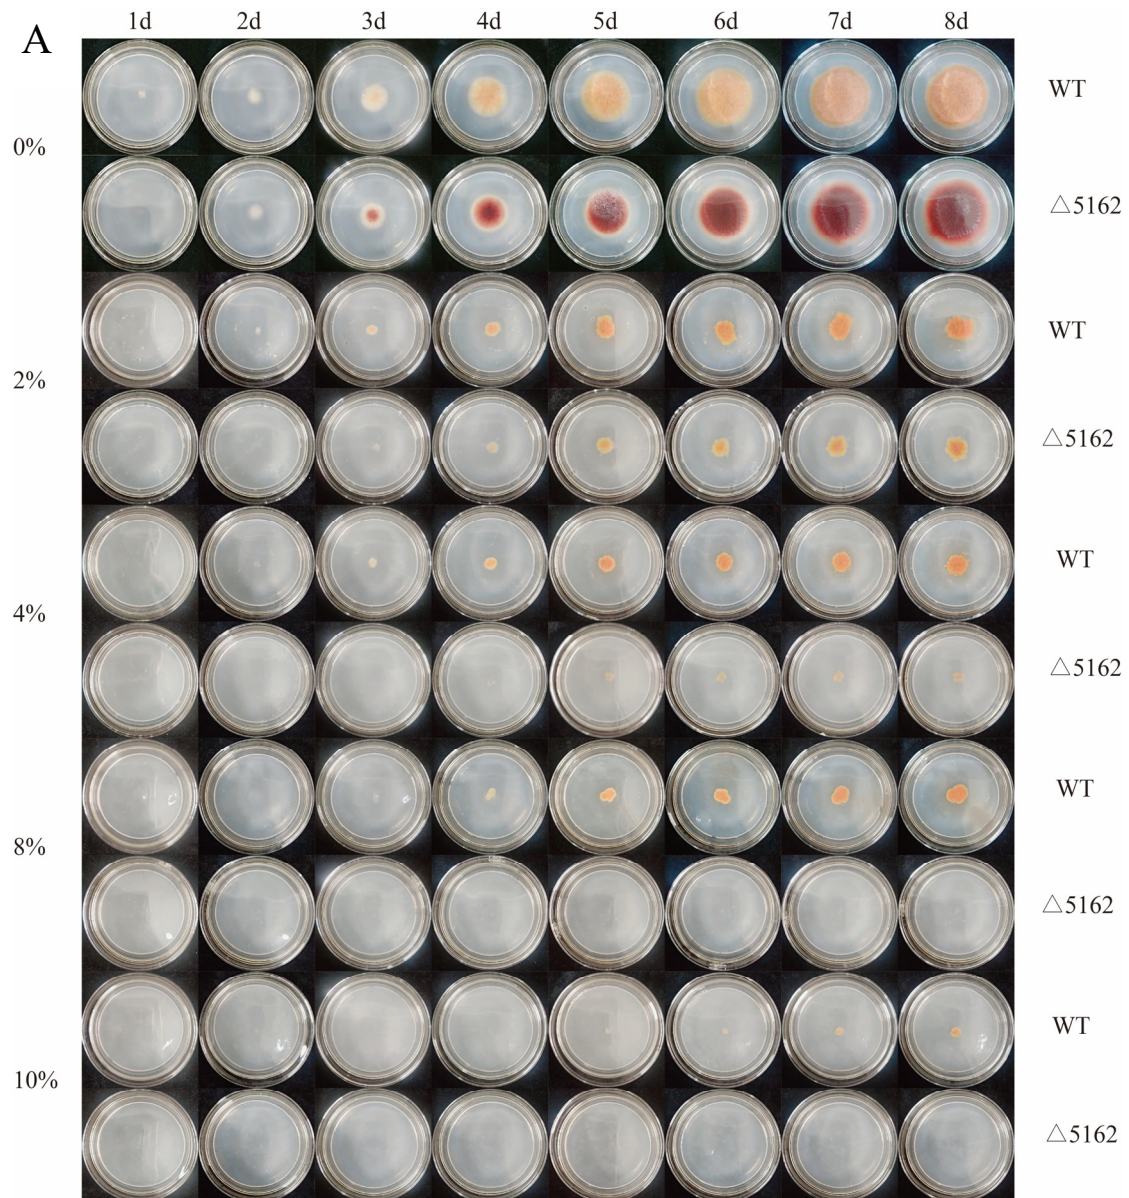

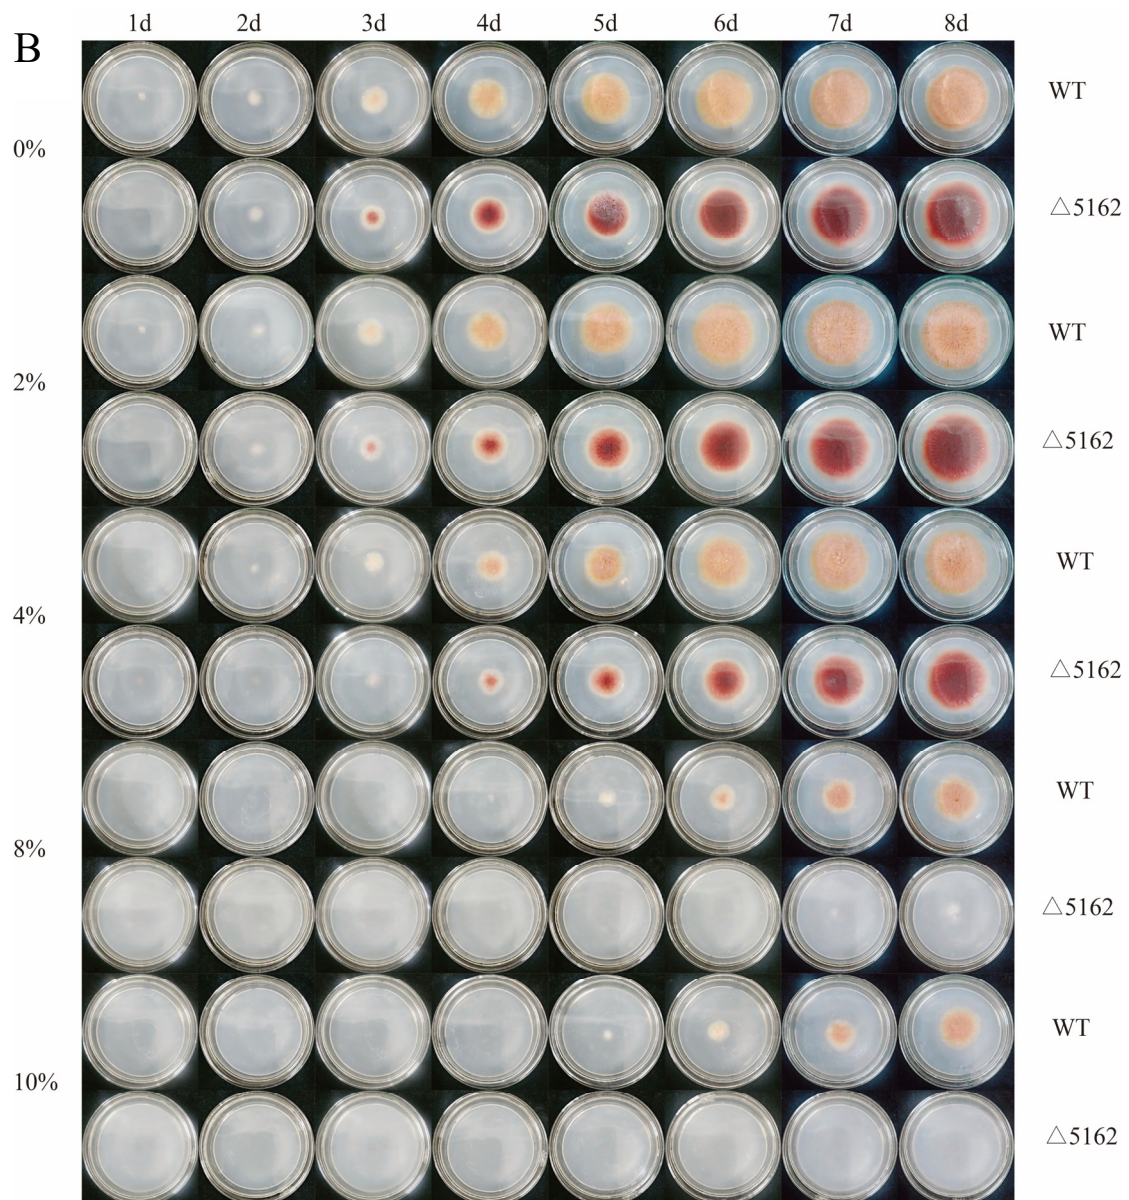



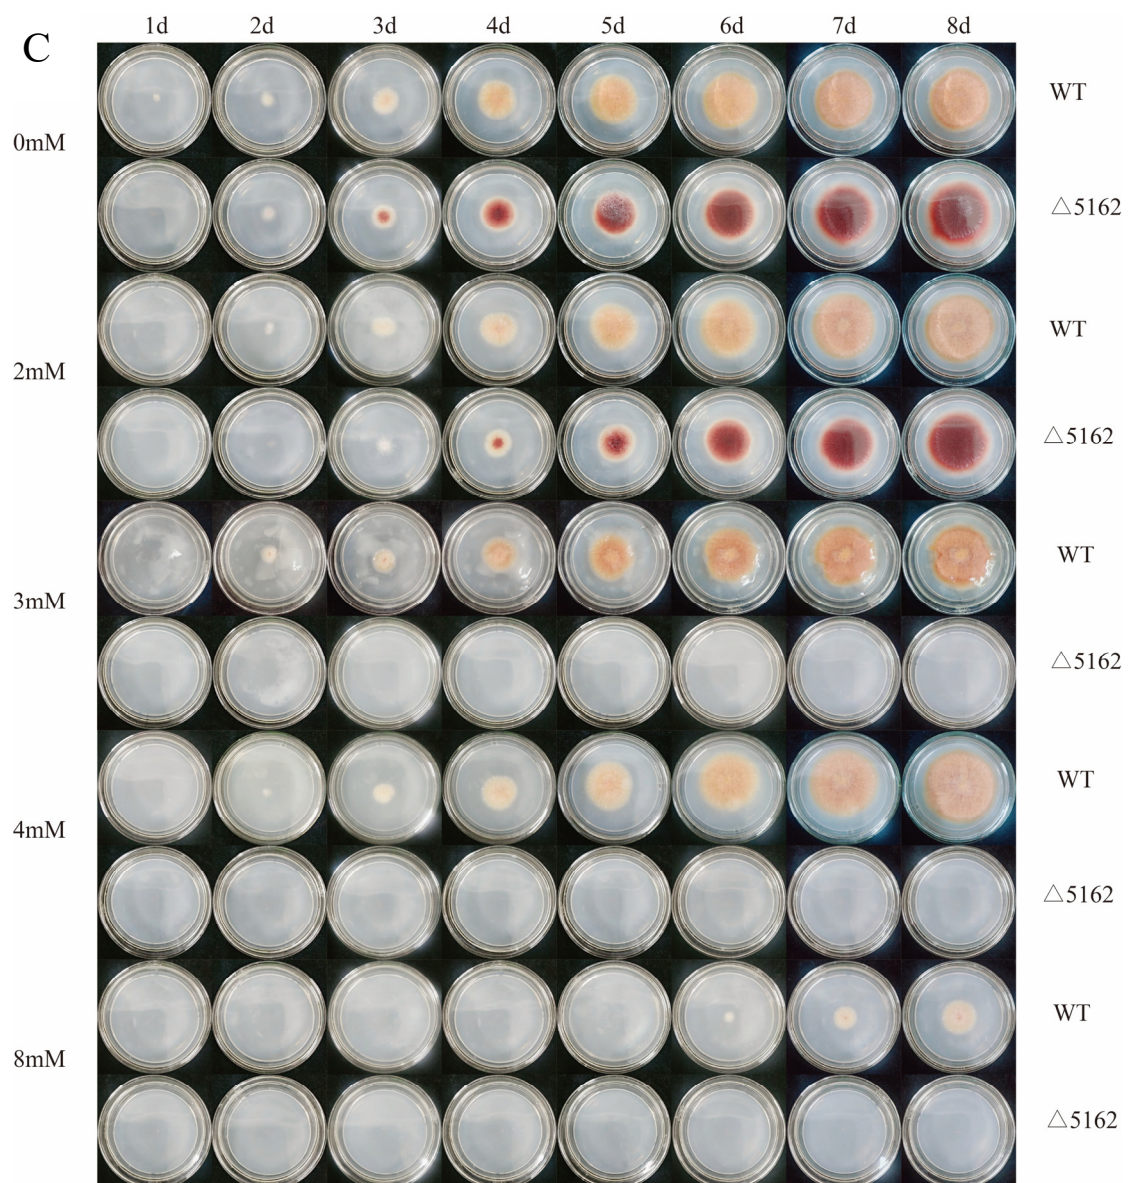

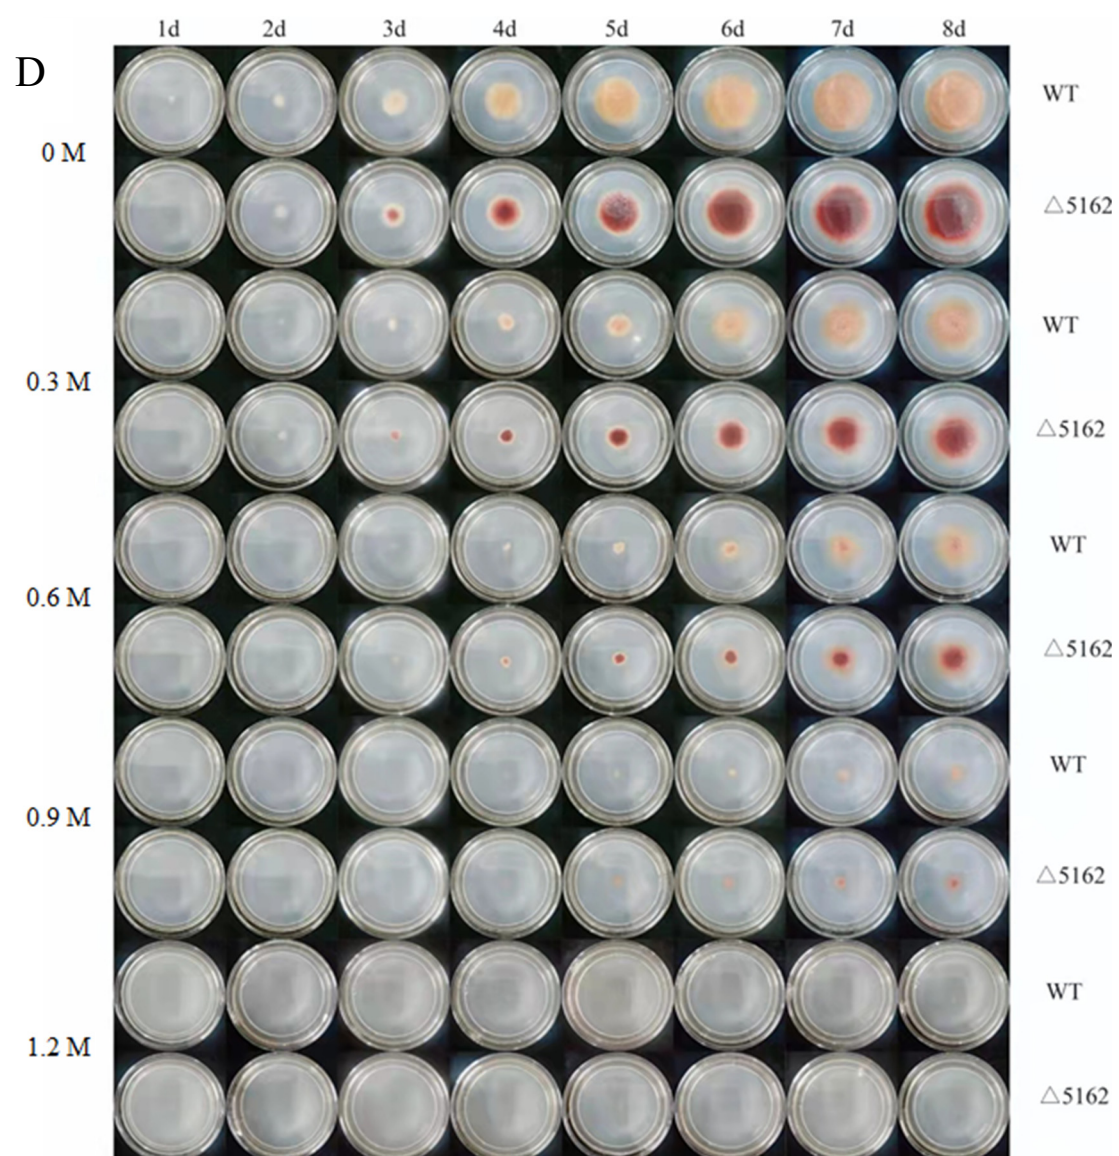

Supplement: s1 [file s1]
