# Supplementary material for: Disruption of the Chitin Biosynthetic Pathway Results in Significant Changes in the Cell Growth Phenotypes and Biosynthesis of Secondary Metabolites of Monascus purpureus
Source: MDPI journal article supplement (doi:10.3390/jof8090910), 2022-08-27
Supplement: s1 [file s1]

**Table S3.** The germination rates (GR) of the conidia of the two strains *M. purpureus* LQ-6 and  $\Delta 5162$  on the PDA medium at 30°C in the dark.

| Strains                              | The theoretical number of colonies | The effective number of<br>colonies-2 d | The effective number of<br>colonies-5 d | GR-2 d | GR-5 d |
|--------------------------------------|------------------------------------|-----------------------------------------|-----------------------------------------|--------|--------|
| <i>M. purpureus</i><br>LQ-6          | 120                                | 106±3                                   | 110±3                                   | 89±2%  | 91±2%  |
| <i>M. purpureus</i><br>$\Delta 5162$ | 80                                 | 18±3                                    | 18±4                                    | 22±3%  | 22±5%  |
