# Supplementary material for: Disruption of the Chitin Biosynthetic Pathway Results in Significant Changes in the Cell Growth Phenotypes and Biosynthesis of Secondary Metabolites of Monascus purpureus
Source: MDPI journal article supplement (doi:10.3390/jof8090910), 2022-08-27
Supplement: s1 [file s1]

**Table S1.** The plasmids and strains used in the study.

| Plasmid/ Strains                  | Relevant characteristics                                                             | Reference                  |
|-----------------------------------|--------------------------------------------------------------------------------------|----------------------------|
| <b>Plasmids</b>                   |                                                                                      |                            |
| pXS-G418                          | Gene deletion vector                                                                 | Presented                  |
| pBARGPE1-Hygro                    | Gene expression vector                                                               | Presented                  |
| pXS-5162                          | Derived from pXS-G418, with the 5162-deleted cassette added                          | This study                 |
| pBA-5162                          | Derived from pBARGPE1-Hygro, with the <i>chs 6</i> fragment added                    | This study                 |
| <b>Strains</b>                    |                                                                                      |                            |
| <i>E. coli</i> DH5 $\alpha$       | Cloning                                                                              | Purchase                   |
| <i>M. purpureus</i> LQ-6          | Wild-type strain                                                                     | <i>Monascus. purpureus</i> |
| <i>M. purpureus</i> $\Delta$ 5162 | Knocking out gene <i>chs 6</i> in <i>M. purpureus</i> LQ-6                           | This study                 |
| <i>M. purpureus</i> cp-5162       | Complementation expression of gene <i>chs 6</i> in <i>M. purpureus</i> $\Delta$ 5162 | This study                 |
