# Supplementary material for: Disruption of the Chitin Biosynthetic Pathway Results in Significant Changes in the Cell Growth Phenotypes and Biosynthesis of Secondary Metabolites of Monascus purpureus
Source: MDPI journal article supplement (doi:10.3390/jof8090910), 2022-08-27
Supplement: s1 [file s1]

**Table S2.** The primers used in the study.

| Primer      | Sequence (5'→3')                                 | Reference  |
|-------------|--------------------------------------------------|------------|
| 5162-up-F   | ATAAGCTTGATATCGAATTCCTCCTCT<br>CGGAAAAAGTCCC     | This study |
| 5162-up-R   | ATACTAGTGGATCCCCCGGGATGACG<br>GTAAGGCTTACAGT     | This study |
| 5162-dn-F   | CCGCCACCGCGGTGGAGCTCTGATCTT<br>TTGTTTGGGCCTTGA   | This study |
| 5162-dn-R   | TTTGCTGGCCTTTTGCTCACATGTCACT<br>TGTATCGGCATCCACC | This study |
| 5162-T-F    | ACTGTAAGCCTTACCGTCAT                             | This study |
| 5162-T-R    | TAGAGGCGACGGGATCCAGA                             | This study |
| pBA-5162-F  | ACTCTAGAGGATCCCCCGGGATGGCG<br>AATCGCTATTCTACC    | This study |
| pBA-5162-R  | GCTTGATATCGAATTCCTCACATGTTC<br>GCTAGTTCA         | This study |
| 5162:cp-T-F | AGAAGTATGCAAAGCATGCG                             | This study |
| 5162:cp-T-R | AACGTCATGCATTGCAGATG                             | This study |
