# Supplementary figures and images for: Disruption of the Chitin Biosynthetic Pathway Results in Significant Changes in the Cell Growth Phenotypes and Biosynthesis of Secondary Metabolites of Monascus purpureus
Source: MDPI journal article supplement (doi:10.3390/jof8090910), 2022-08-27

**Figure S1.** Construction process of gene *chs6* deletion and complementation plasmids pXS-5162 and pBA-5162.

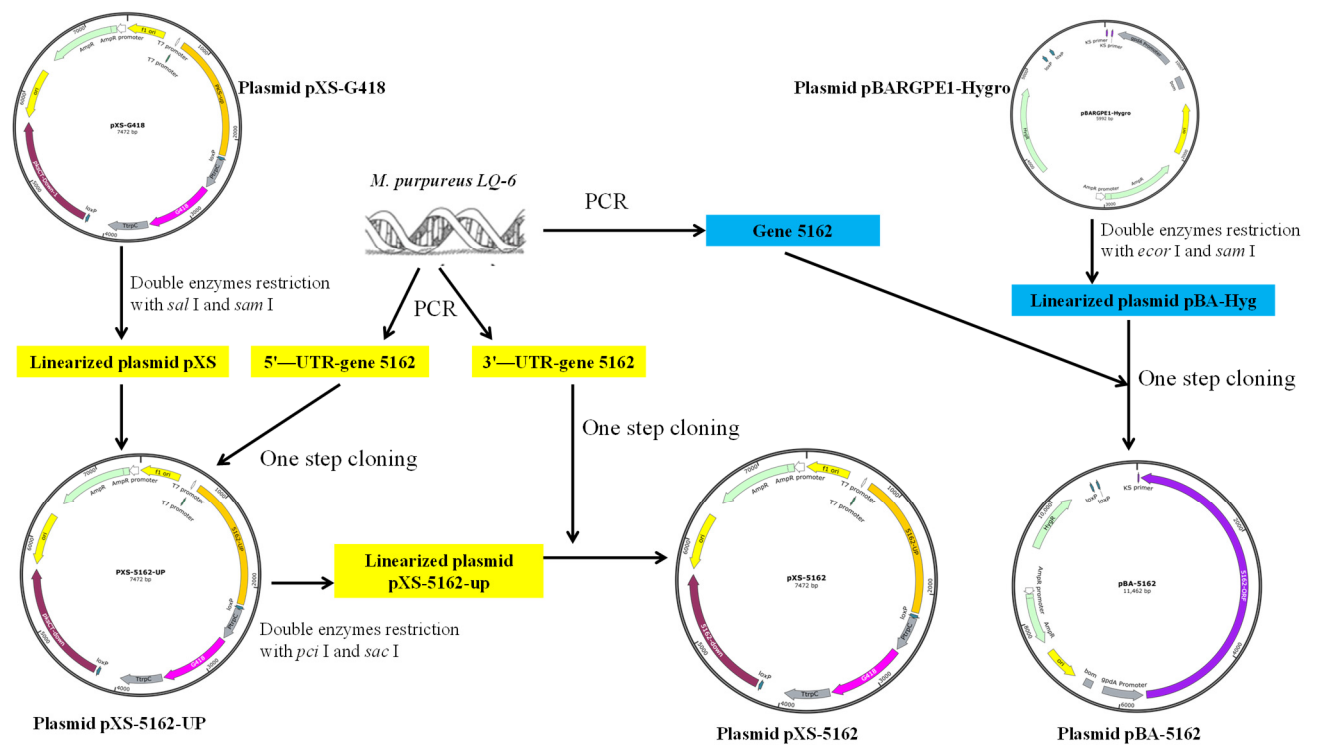

Supplement: s1 [file s1]
